# Supplementary material for: Field Evaluation of a Push-Pull System to Reduce Malaria Transmission
Source: PLoS One. 2015 Apr 29;10(4):e0123415. doi: 10.1371/journal.pone.0123415 (PMC4414508; doi:10.1371/journal.pone.0123415)
Supplement: S1 Dataset — Provided in adherence to the PLOS policy to make all data underlying the findings described in this manuscript fully available. (XLSX) [file pone.0123415.s001.xlsx]

## Sheet: Lab
ID	Date	Sample	name	Lin	Lon	totaal	Lout	Ltotaal	Temp 1	RH	Temp2
1	2013-05-30	2	treated	10	15	25	1	26	26.5	67	38.1
2	2013-05-30	2	treated	11	4	15	0	15	26.5	68	39.4
3	2013-05-30	1	untreated	19	12	31	0	31	27	68	38.2
4	2013-05-30	2	treated	12	2	14	0	14	27	69	39.1
5	2013-05-30	1	untreated	33	9	42	0	42	27	69	38.1
6	2013-05-30	1	untreated	22	10	32	1	33	27	71	38.1
7	2013-05-30	1	untreated	25	10	35	0	35	27	71	39.1
8	2013-05-30	2	treated	12	4	16	0	16	27	70	38.4
9	2013-05-31	2	treated	12	2	14	6	20	27	69	38.2
10	2013-05-31	2	treated	13	3	16	0	16	27	69	37.4
11	2013-05-31	1	untreated	26	5	31	4	35	27	70	37.8
12	2013-05-31	1	untreated	32	4	36	2	38	27	70	38.4
13	2013-05-31	1	untreated	29	5	34	2	36	27	70	37.2
14	2013-05-31	2	treated	10	3	13	1	14	27	70	37.9
15	2013-05-31	2	treated	11	4	15	2	17	27	70	37.3
16	2013-05-31	1	untreated	28	9	37	7	44	27	96	37.8
17	2013-06-25	1	untreated	25	12	37	1	38	26.5	70	37.1
18	2013-06-25	2	treated	14	6	20	0	20	26.5	71	37.4
19	2013-06-25	2	treated	14	10	24	0	24	27	70	36
20	2013-06-25	1	untreated	28	14	42	0	42	27	72	38
21	2013-06-25	1	untreated	25	13	38	0	38	27	72	36.9
22	2013-06-25	2	treated	12	7	19	0	19	27	71	35.9
23	2013-06-25	2	treated	10	8	18	0	18	27	72	36.2
24	2013-06-25	1	untreated	27	9	36	0	36	27	70	36.3
25	2013-08-20	1	untreated	18	10	28	3	31	27	72	37.1
26	2013-08-20	2	treated	8	7	15	8	23	27	73	37.7
27	2013-08-20	1	untreated	28	4	32	4	36	27	71	38.1
28	2013-08-20	2	treated	10	2	12	1	13	27	72	37.5
29	2013-08-20	1	untreated	30	7	37	3	40	27	72	37.2
30	2013-08-20	2	treated	7	5	12	3	15	27	73	38.1
31	2013-08-20	1	untreated	30	5	35	3	38	27	72	36.9
32	2013-08-20	2	treated	9	4	13	3	16	27	73	37.4
33	2013-11-28	1	untreated	16	8	24	0	24	26	70	37.3
34	2013-11-28	2	treated	8	4	12	0	12	26	71	36.9
35	2013-11-28	1	untreated	14	11	25	2	27	27	72	37.6
36	2013-11-28	2	treated	7	6	13	0	13	27	70	37.9
37	2013-11-28	1	untreated	14	10	24	0	24	27	70	37.5
38	2013-11-28	1	untreated	15	8	23	2	25	27.5	71	37.9
39	2013-11-28	2	treated	8	5	13	0	13	27	71	37.8
40	2013-11-28	2	treated	10	3	13	0	27	37.3	71	37.3
41	2013-11-29	1	untreated	12	10	22	8	30	27	70	37.6
42	2013-11-29	1	untreated	14	8	22	5	27	27	70	37.9
43	2013-11-29	2	treated	8	4	12	2	14	27	70	37.3
44	2013-11-29	2	treated	7	4	11	1	12	27	70	37.9
45	2013-11-29	1	untreated	17	10	27	1	28	27	70	37.5
46	2013-11-29	2	treated	6	4	10	3	13	27	70	37.3
47	2013-11-29	1	untreated	15	11	26	3	29	27	70	37.8
48	2013-11-29	2	treated	8	5	13	0	13	27	70	37.7
